# Supplementary material
Source: MDPI journal article supplement (https://www.mdpi.com/2673-4583/8/1/96)
Supplement: s1 [file s1 › chemproc-1709730-supplementary.pdf]

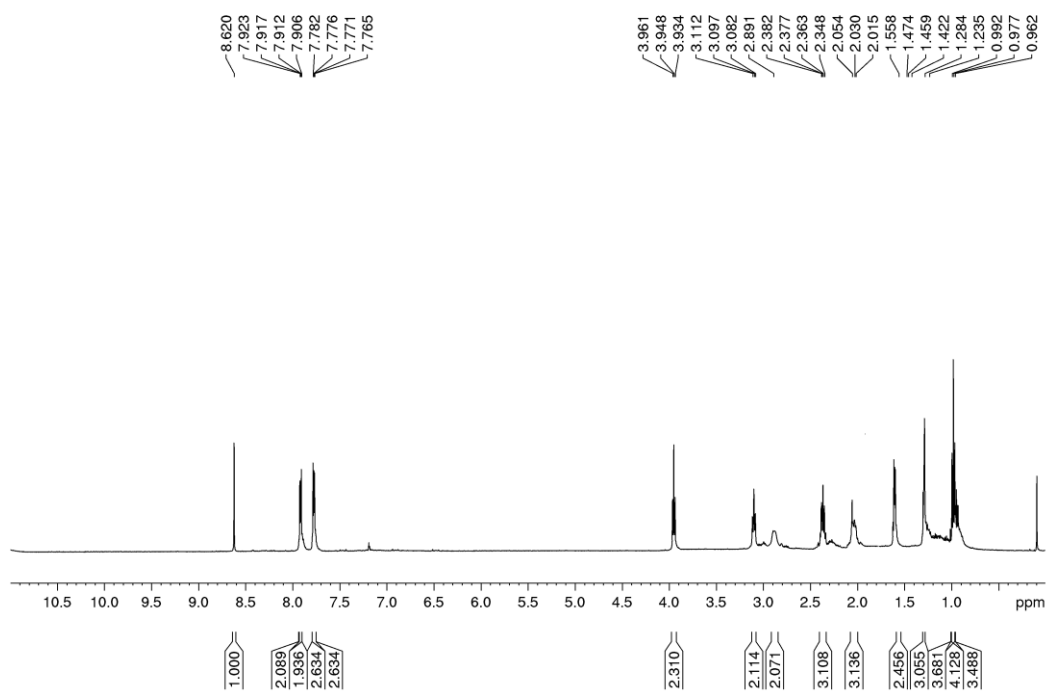

Figure S1. Copy of  $^1\text{H}$  NMR spectra of compound 4.

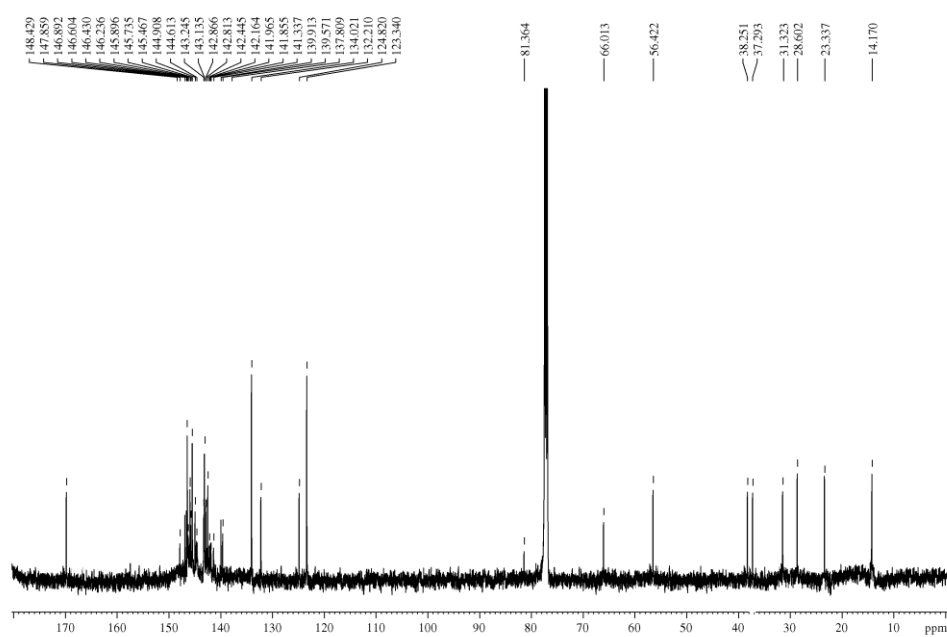

Figure S2. Copy of  $^{13}\text{C}$  NMR spectra of compound 4.

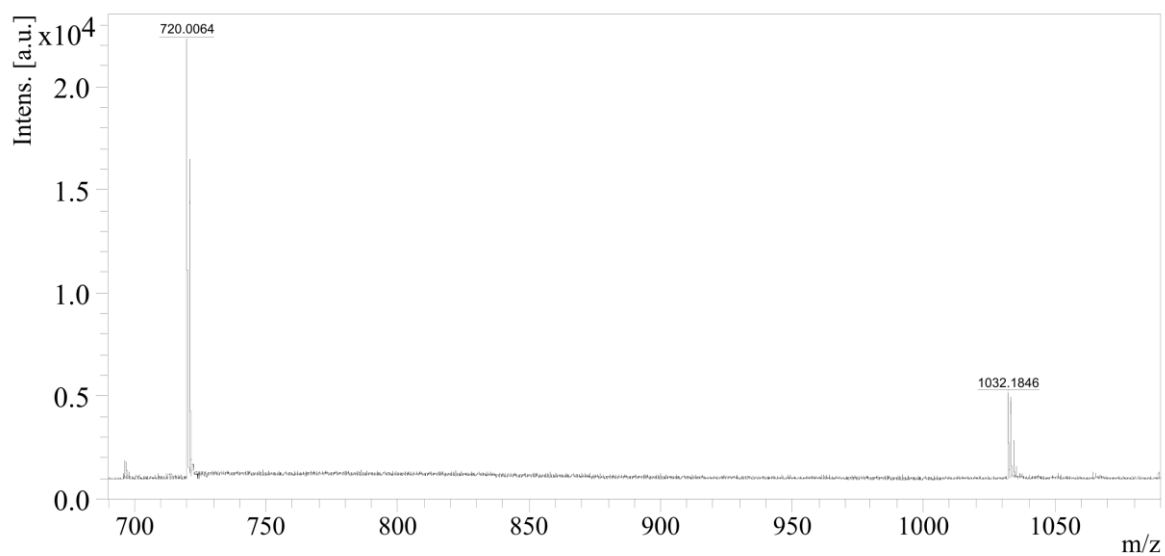

Figure S3. Copy of HRMS spectra of compound 4.

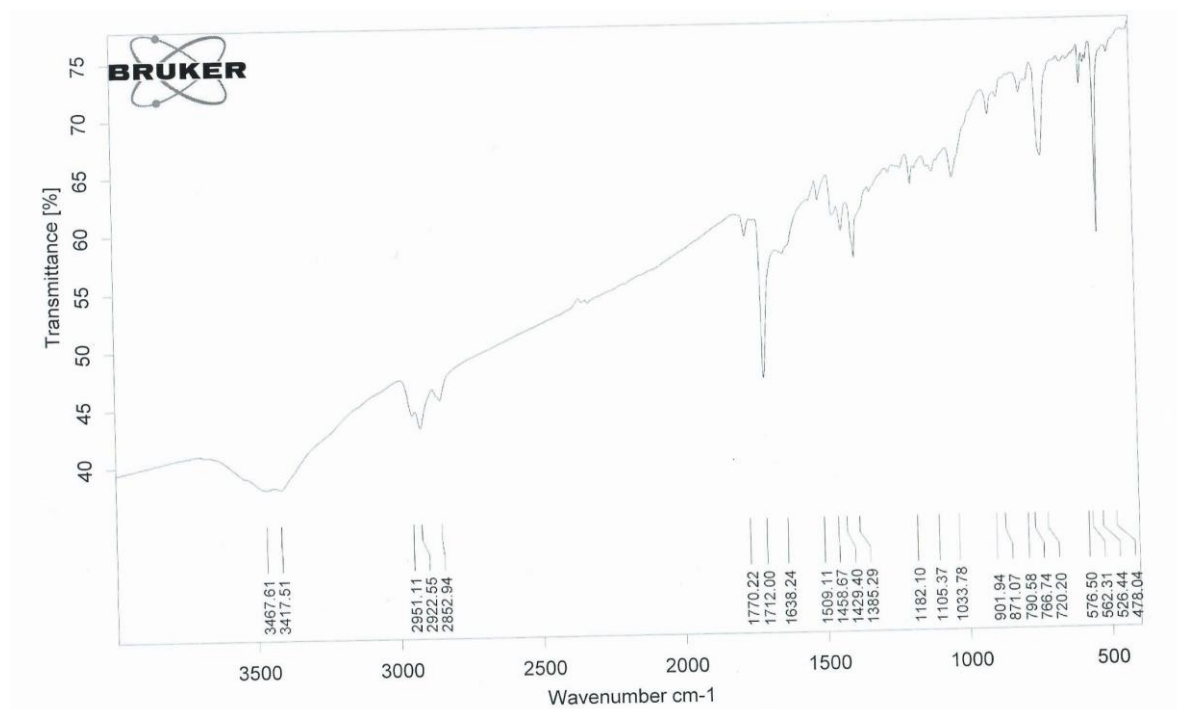

Figure S4. Copy of IR spectra of compound 4.

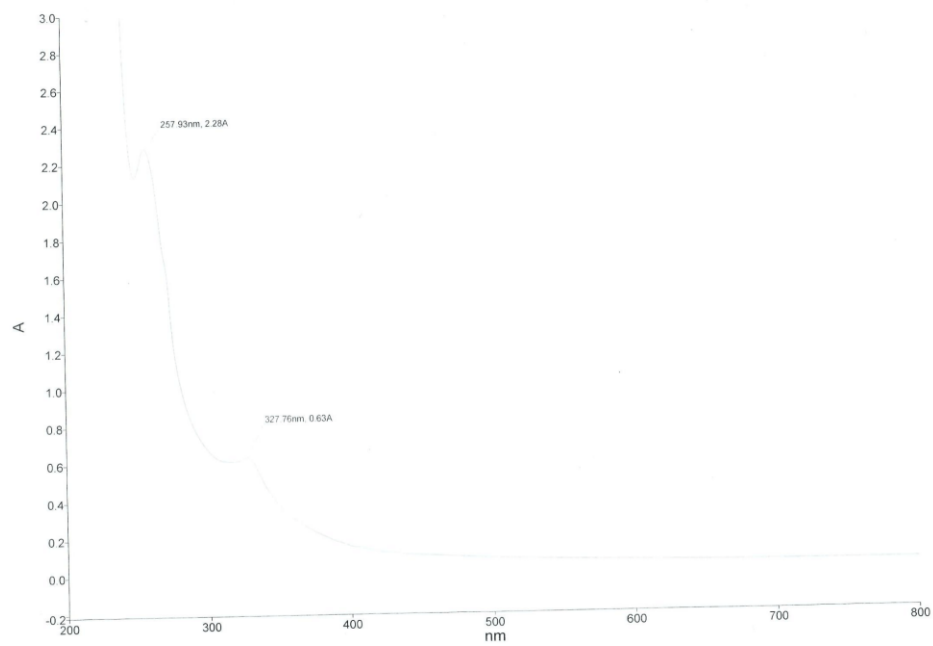

**Figure S5.** Copy of UV spectra of compound **4**.
